# Supplementary material for: Aberrant prefrontal beta oscillations predict episodic memory encoding deficits in schizophrenia
Source: PubMed Central journal article supplement — Neuroimage Clin. 2016 Aug 30;12:499–505. doi: 10.1016/j.nicl.2016.08.017 (PMC5026693; doi:10.1016/j.nicl.2016.08.017), 2016-08-30
Supplement: mmc1.pdf [file mmc1.pdf]

Supplementary Information

Supplementary Figure 1.

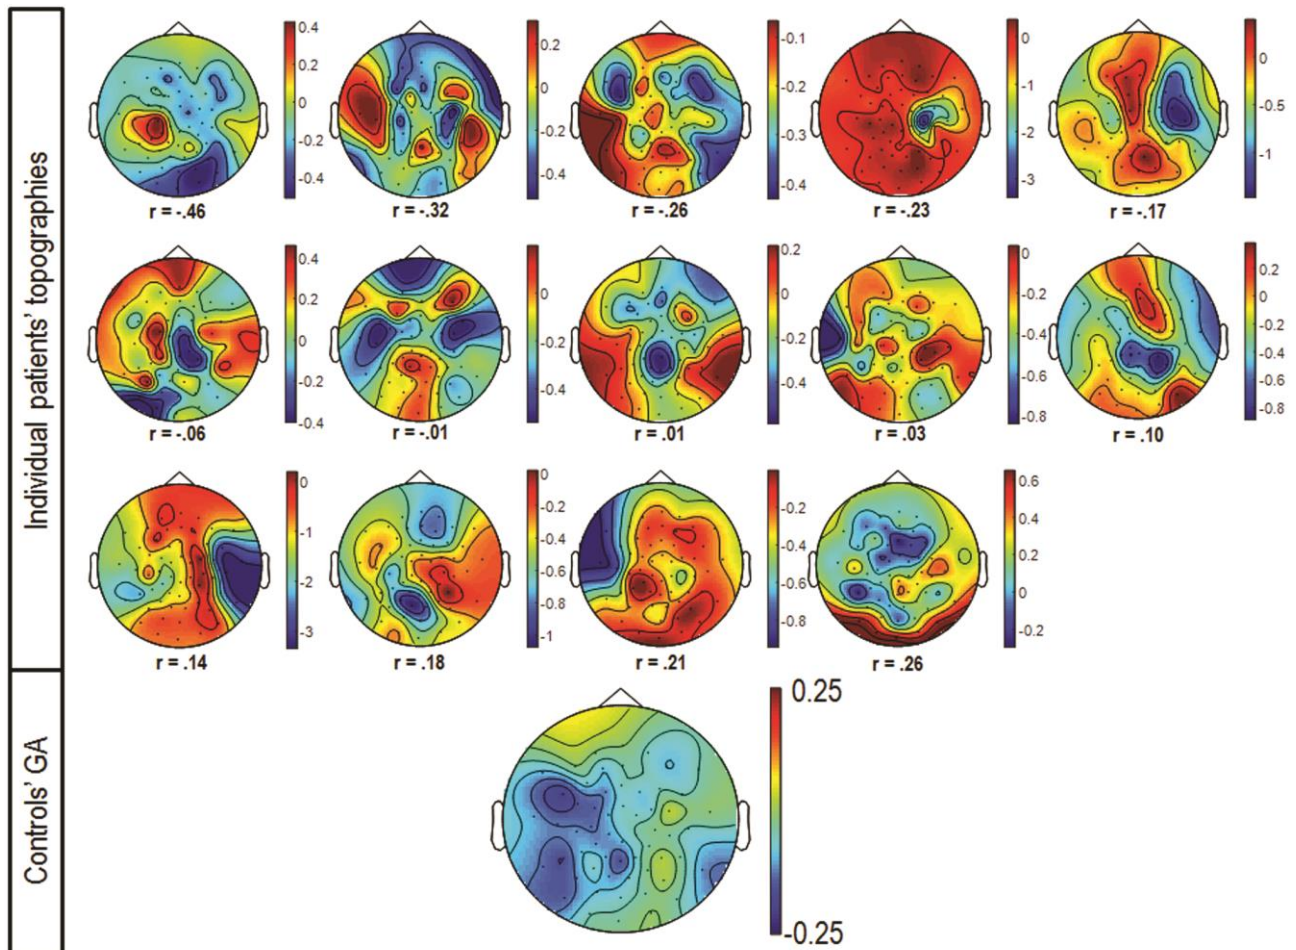

Individual patients' topographic distribution of maximum power decrease associated with subsequent memory effect (SME) observed along 8-20 Hz frequency range in 1 s time-window (top panel; outlier not included; similarity values are presented by Pearson's  $r$ s). Grand average of controls' topographic distribution of maximum SME.
